# Supplementary material
Source: Springer Nature journal article supplement (https://www.springermedizin.de/resource/supplementary/13026_2008_19_MOESM1_ESM.pdf/9644486)
Supplement: MOESM1 [file 9644486]

Trial Recruitment and Enrollment  
August 2006 - June 2010

Telephone Screening

Clinical Screening

Randomization of Eligible Subjects to Treatment Group\* (N=488)

A  
OMT +  
UPT  
(n=122)

B  
Sham OMT  
+ UPT  
(n=122)

C  
OMT +  
Sham UPT  
(n=122)

D  
Sham OMT  
+ Sham UPT  
(n=122)

\*OMT denotes osteopathic manipulative treatment; UPT, ultrasound physical therapy.
